# Supplementary material
Source: publisher figshare collection journal article supplement (https://gsajournals.figshare.com/articles/dataset/_/10262951)
Supplement: Supplementary file 1 [file 1]

## Sheet: Supplemental Table S4
Supplemental Table S4. Best linear unbiased predictors (BLUPs) of adult maize leaf cuticular conductance (gc; g∙h-1∙g-1) and flowering time (FT; days to anthesis) for 451 maize inbred lines from each of four single environments [Maricopa (MA) and San Diego (SD) in 2016 and 2017; MA16, SD16, MA17, SD17], in a location (MA and SD), and across all four environments (AllEnv).
Maize inbred line	gc_MA16	gc_SD16	gc_MA17	gc_SD17	gc_MA	gc_SD	gc_AllEnv	FT_MA16	FT_SD16	FT_MA17	FT_SD17	FT_MA	FT_SD	FT_AllEnv
A	0.278165	0.1383	0.196398	0.195418	0.23614	0.159682	0.212761	76.9472	67.1562	82.0427	62.4714	77.9787	65.3075	71.4011
A12	0.256681	0.119062	NA	0.184591	0.222908	0.139611	0.195712	70.6286	59.923	68.9256	54.8663	68.9539	57.5096	62.8194
A15	0.317441	NA	0.209702	NA	0.263294	NA	0.231695	59.7968	66.358	66.6797	52.7313	63.2653	60.3418	61.3369
A155	0.250452	0.113191	0.248795	0.150012	0.242852	0.118287	0.195535	65.2127	66.358	68.5094	52.7198	65.9139	60.5447	62.7581
A171	0.302737	0.127074	NA	0.194206	0.261767	0.150111	0.222661	57.9915	61.5715	66.8072	50.7581	61.7591	56.567	58.4879
A188	0.26053	NA	0.191813	0.168574	0.224529	0.123406	0.192185	65.2127	70.8293	68.0782	54.5888	65.3134	64.0988	64.2334
A239	0.225106	0.0978206	0.166691	0.16111	0.194542	0.112475	0.164468	74.2392	65.9091	79.4507	62.5003	75.5452	64.6385	70.0838
A258	0.260597	NA	0.136907	0.160439	0.201574	0.117642	0.174095	73.3366	70.6369	74.3666	62.0648	72.6024	67.7442	69.9759
A305	NA	0.133883	NA	0.171941	NA	0.155814	0.203801	64.31	NA	67.9335	59.6679	65.2676	63.1516	62.4452
A321	0.211729	NA	0.204802	0.181135	0.203151	0.132735	0.181387	66.1153	72.1387	69.6635	56.7353	67.0743	65.3447	65.9632
A322	0.296829	0.120317	0.239211	0.225023	0.264324	0.160654	0.229492	67.018	60.0356	73.4173	54.8663	68.9715	57.3699	62.7979
A334	0.265101	0.106831	0.17625	0.167128	0.220524	0.122501	0.185888	66.1153	59.655	71.6477	53.3927	67.9893	56.6669	61.9088
A340	0.230786	0.100916	0.200811	0.129607	0.211952	0.101163	0.167226	68.8233	64.5556	70.9922	56.8644	68.2666	60.912	64.2007
A374	0.231051	0.114062	0.199406	0.205001	0.211509	0.144292	0.191307	69.7259	67.7871	73.2712	56.3069	70.2601	62.9744	66.4172
A385	0.255439	NA	NA	0.211502	0.22186	0.153821	0.205752	61.6021	60.6255	66.8072	54.5888	63.7373	57.9707	60.236
A401	0.237264	0.108761	0.174546	0.166426	0.204513	0.122629	0.175854	69.7259	65.1543	73.1371	58.7703	70.1166	62.619	65.931
A415_1_3_INBRED	NA	0.104746	0.170773	0.160882	0.197896	0.117686	0.167754	82.3631	67.7871	81.9429	63.7846	80.5678	66.427	73.4729
A427	NA	0.111764	0.157865	0.176566	0.189597	0.129519	0.174656	73.3366	64.5244	75.0183	55.5721	72.7291	60.613	66.3594
A554	NA	0.103976	0.215007	0.217535	0.226335	0.142901	0.200445	73.3366	59.923	69.8899	54.4961	70.8513	57.5748	63.9387
A572	0.291793	0.113136	0.219502	0.220715	0.253304	0.150763	0.219404	63.4074	60.0619	67.4596	54.4379	65.0957	57.2011	60.7096
A627	0.22988	0.0986348	0.181286	0.154497	0.203278	0.110492	0.16995	69.7259	64.5556	72.6735	56.745	69.8876	60.977	64.9921
A632	0.199858	0.118134	0.109227	0.136439	0.156605	0.115933	0.14611	73.3366	66.108	73.1371	59.4242	71.9006	63.5242	67.4801
A635	0.267603	0.109772	0.181537	0.149904	0.224113	0.117053	0.182872	72.4339	65.8427	74.3321	63.0108	71.9249	64.5759	67.9259
A648	0.243001	0.116344	0.229942	0.204644	0.230863	0.145182	0.20218	73.3366	61.7716	72.5883	58.1759	71.8449	60.296	65.9568
A649	0.307812	0.125275	0.258591	NA	0.278475	0.145311	0.23804	60.6994	59.7729	64.744	NA	62.4447	57.7186	58.497
A651	0.247932	0.0968407	0.182764	0.203754	0.213817	0.130729	0.186814	66.1153	63.0811	71.536	52.7313	68.0188	58.148	62.5813
A659	0.258252	0.115828	0.197719	0.164202	0.22575	0.127299	0.191325	71.5313	65.1723	79.4577	62.352	73.6351	64.0585	68.6937
A661	NA	0.104955	0.182275	0.135008	0.205291	0.105426	0.163341	62.5047	60.2391	66.6797	54.6003	64.1816	57.7313	60.1671
A662	NA	NA	0.195501	0.218579	0.213794	0.158901	0.204827	59.7968	70.8063	65.5522	56.3651	62.4556	64.9932	63.4102
A663	NA	0.12709	0.191732	0.175014	0.211371	0.142145	0.192893	82.3631	65.6934	76.8995	60.2879	78.7932	63.4911	71.2369
A673	0.274769	NA	0.217211	0.176931	0.242989	0.129198	0.206844	59.7968	60.6448	70.0516	54.796	63.8484	57.7853	60.3863
A674	0.245328	NA	0.189288	0.188368	0.215118	0.136373	0.190193	67.018	60.7815	74.5693	55.0323	70.3789	58.2423	63.8259
A679	NA	0.0954483	0.15893	0.148766	0.190281	0.104543	0.15691	71.5313	64.8918	75.1561	58.3383	72.1675	62.2082	66.891
A680	NA	0.0886655	0.155638	0.146977	0.188165	0.0980583	0.152057	77.8498	65.5228	75.1452	59.4242	75.7794	62.6988	69.1326
A682	0.227345	0.0999392	0.183145	0.175282	0.202663	0.121861	0.17343	64.31	69.0932	69.5759	55.0243	66.4922	62.7918	64.3468
A71	0.245936	0.133089	0.215676	0.274147	0.226502	0.192065	0.22677	70.6286	68.3296	70.2553	62.0648	69.5104	65.9742	67.3552
A73	0.224875	0.108769	0.159582	0.162752	0.191438	0.121238	0.168835	72.4339	65.5228	75.3586	59.5772	72.1808	62.8323	67.2213
A797NW	0.220924	0.112891	0.161443	0.179029	0.190047	0.130897	0.17327	84.1684	70.8868	85.0944	68.6551	83.1483	70.5488	77.2711
ABP15	NA	0.105473	0.175556	0.169893	0.200971	0.123007	0.174569	67.9206	62.1544	70.7554	56.7353	68.4073	59.6689	63.4924
AR228	NA	0.0968824	0.141791	0.176171	0.179262	0.117788	0.161091	82.3631	71.245	84.916	64.3272	82.7482	68.9102	76.2394
AUSTRCF_306238	NA	0.106547	0.162321	0.174692	0.192462	0.124282	0.171195	77.8498	67.6176	83.2131	61.5237	79.2059	65.7997	72.7083
B_18_INBR_FR_SUPERGOLD	0.23675	0.122785	NA	0.228862	0.206092	0.163181	0.20496	76.9472	66.074	68.1111	58.6799	71.9486	62.6663	66.9555
B_28	0.217808	NA	0.136131	0.161931	0.177736	0.119243	0.157405	78.7525	66.6819	76.3513	63.0914	75.8545	65.348	70.6916
B10	NA	NA	0.16304	0.158247	0.192924	0.115156	0.165575	82.3631	75.7408	83.45	62.4582	81.5565	70.6273	76.3711
B101	0.19823	NA	0.144908	0.19449	0.170652	0.140834	0.162398	76.9472	71.0884	85.4374	64.3272	80.1967	69.1384	74.9114
B103	0.21231	0.11105	0.142638	0.163275	0.177439	0.123465	0.161223	72.4339	65.4486	77.3765	57.8358	73.7017	62.5837	67.925
B104	0.186753	NA	0.116276	0.13216	0.152356	0.0980181	0.129555	84.1684	70.6369	82.9356	65.2749	82.2593	68.8721	75.8168
B105	0.259078	0.108194	0.162721	0.183306	0.211549	0.130795	0.184313	79.6551	65.1543	80.737	59.5772	79.2664	62.7273	70.7163
B106	0.218642	0.114786	0.156633	0.1777	0.186779	0.134426	0.173178	70.6286	70.8679	75.2985	62.3423	72.1678	67.7487	69.8812
B107	0.211841	0.0974287	0.184505	0.162099	0.194713	0.111162	0.164651	73.3366	65.5228	73.7219	57.9169	72.308	62.3394	67.0571
B108	NA	0.117026	0.16964	0.202393	0.197167	0.146778	0.189949	82.3631	64.5556	77.5172	58.2341	78.517	61.9796	69.8875
B109	0.219506	0.0856772	0.146415	0.137226	0.182975	0.0923195	0.147463	76.0445	66.0425	82.6156	66.0195	78.7165	66.5319	72.4837
B110	0.18413	0.102495	0.142549	0.155442	0.161916	0.114882	0.148463	78.7525	69.6081	86.8904	67.1439	81.0345	68.8999	75.0145
B111	0.20262	0.095996	0.145944	0.179734	0.173498	0.119566	0.156739	74.2392	68.6609	82.8321	63.5239	77.6235	66.6517	72.2469
B113	0.178755	0.0954005	0.123986	0.131215	0.151189	0.0957121	0.131819	78.7525	68.9806	80.9508	63.5239	78.0193	67.1596	72.7422
B114	0.22197	0.0997903	0.22393	0.184529	0.216788	0.125515	0.182864	68.8233	62.4294	73.5289	56.8644	70.0732	59.9477	64.7165
B115	0.191817	0.0965581	0.123229	0.127027	0.15805	0.0950015	0.13421	70.6286	65.8048	77.4148	57.9169	72.8828	62.9663	67.7308
B119	0.206839	0.0960761	NA	0.137379	0.180855	0.10049	0.14945	77.8498	66.2775	84.5586	67.7639	79.4711	67.4908	73.7029
B120	0.182387	0.0987028	0.126177	0.14471	0.154102	0.105073	0.138617	74.2392	64.8918	78.7208	62.2815	75.0298	63.9662	69.3155
B121	NA	0.103992	0.130432	0.136972	0.171959	0.105372	0.149886	82.3631	65.8113	85.5691	61.9139	81.9332	64.7901	73.446
B14	NA	0.102123	0.146962	0.146186	0.182587	0.110296	0.157147	70.6286	68.0985	79.6875	64.1893	74.3067	66.9481	70.6132
B14A	0.241854	0.102461	0.148259	0.141195	0.196027	0.106523	0.16283	76.0445	68.2984	78.4249	73.0172	76.3922	71.0274	73.8749
B164	0.239736	0.11076	0.182965	0.203311	0.209397	0.141838	0.190478	68.8233	64.9842	74.2817	56.9013	70.3736	61.4853	65.6946
B2	0.198163	0.0904402	0.166148	0.149585	0.179509	0.102363	0.150863	77.8498	66.4014	80.2129	60.1671	78.1099	64.1271	71.0023
B37	0.233345	NA	0.21116	0.153295	0.217692	0.112121	0.181422	75.1419	68.7582	76.5766	63.1622	75.0838	66.3237	70.5582
B42	0.251452	0.108723	0.202442	NA	0.223991	0.124783	0.191999	77.8498	69.2968	77.1884	NA	76.2054	66.6066	71.4007
B52	NA	NA	NA	0.161708	NA	0.118971	0.17127	82.3631	68.6609	85.9827	62.3423	82.8838	65.8446	74.1813
B54	0.259378	NA	0.17101	0.182556	0.215185	0.133485	0.188775	76.9472	71.3488	84.3276	59.7672	78.9993	66.7411	72.7322
B64	NA	0.0952656	0.162796	0.15406	0.192767	0.107396	0.160295	83.2657	81.1385	83.0584	68.9997	81.4114	77.181	79.6446
B66	NA	0.0979659	0.174596	0.183967	0.200354	0.123175	0.174468	72.4339	64.2952	76.8657	58.2341	73.7094	62.2246	67.8688
B68	0.234045	0.0921547	0.13737	NA	0.187177	0.104786	0.156838	77.8498	70.0745	85.7054	NA	80.1219	67.8923	74.6862
B7	NA	0.0967845	0.171678	0.171786	0.198478	0.116492	0.169941	85.9737	63.5469	83.1609	65.0755	83.414	64.86	74.0438
B73	0.211791	0.0950906	0.158163	0.12648	0.183654	0.0938892	0.147343	76.9472	65.5457	76.3077	60.3194	76.9405	63.1367	70.0929
B75	0.198521	NA	0.164881	0.166146	0.179176	0.12093	0.16014	73.3366	72.1387	75.2196	61.1791	73.6903	67.4708	70.4942
B77	0.259128	0.0977721	0.186659	0.17633	0.221601	0.118802	0.183985	79.6551	67.6176	78.8561	62.272	77.5589	65.78	71.7321
B79	0.190729	NA	0.150227	0.121615	0.168757	0.0901354	0.139825	79.6551	75.1316	68.4002	62.0648	73.1819	69.8307	71.4236
B8	NA	0.0951583	0.140677	0.16345	0.178546	0.110445	0.155883	68.8233	64.5244	71.8406	60.0449	69.2771	62.7235	65.7925
B84	0.16925	0.0861501	0.128487	0.128639	0.147851	0.0886718	0.125246	76.9472	71.8811	84.8645	64.4584	79.5123	69.0424	74.3016
B85	0.192449	0.0891907	0.140021	0.159756	0.165429	0.106653	0.144109	72.4339	65.3192	74.279	55.7788	72.6384	61.0481	66.6329
B87	0.219977	0.1114	0.15553	0.136307	0.187051	0.11231	0.161682	73.3366	65.739	78.2803	60.9811	74.6829	63.5613	69.0669
B88	NA	0.0820297	0.14293	NA	0.179994	0.0938504	0.144923	82.3631	67.7871	84.4968	NA	82.4494	65.5601	74.9857
B90	0.180613	0.0956457	0.13365	0.154574	0.156257	0.108608	0.14168	77.8498	68.3069	77.0374	61.9156	75.8104	65.953	70.7852
B91	NA	NA	0.165037	0.16278	0.194207	0.118598	0.167717	79.6551	70.3401	76.0858	58.3383	76.9571	65.7371	71.0423
B97	0.253008	0.0982931	0.123129	0.174759	0.191635	0.118232	0.167314	75.1419	67.8101	85.2682	62.352	79.249	65.7338	72.6368
B99	0.188947	0.0927199	0.125696	0.133497	0.157506	0.0969348	0.137155	82.3631	62.0601	82.5093	60.8687	81.0983	61.6615	71.2322
C102	NA	0.106602	0.185057	0.140645	0.207079	0.109105	0.167483	76.9472	65.6032	78.9848	62.0743	76.1188	64.0714	70.1461
C103	NA	NA	0.215587	0.144399	0.226708	0.106617	0.178064	75.1419	66.2034	75.8621	61.3858	74.5922	64.6282	69.5529
C123	0.206339	0.0997959	0.145741	0.131605	0.175457	0.100494	0.147399	70.6286	64.3995	76.2391	60.9811	72.0753	62.9264	67.3292
C42	0.282284	0.116086	0.166847	0.170107	0.226029	0.132003	0.192106	60.6994	59.0495	67.5688	45.3359	63.0666	52.2279	57.0483
C49A	NA	0.114109	0.295487	0.219971	0.278079	0.151374	0.231448	63.4074	58.0228	73.6141	51.2039	67.6531	54.4656	60.3582
C68	0.252934	0.105408	0.174391	0.161208	0.213059	0.117985	0.177713	66.1153	60.7815	70.9852	55.1134	67.4913	58.2998	62.3075
CG10	0.284306	0.117872	0.224858	0.189274	0.251432	0.142107	0.213296	63.4074	59.0408	72.2718	52.2912	66.6885	56.1587	60.9209
CH157	NA	0.107909	0.179308	0.16164	0.203383	0.121211	0.176132	NA	63.5697	72.3343	56.6462	70.2381	60.5246	64.8456
CH701_30	0.226138	0.0926944	0.137852	0.17493	0.183034	0.115294	0.161186	77.8498	60.9198	75.6031	54.876	75.4159	58.244	66.7049
CH753_4	0.242558	0.092742	0.207865	0.13829	0.221375	0.0978405	0.174251	67.018	62.5516	74.6954	56.6462	70.3697	59.6884	64.4284
CH9	NA	0.125724	NA	0.169443	NA	0.137466	0.184791	70.6286	65.5228	75.2196	55.9416	72.4999	61.3345	66.8793
CHI_TAN_120	0.238835	NA	0.190253	0.172811	0.211954	0.126279	0.184513	66.1153	59.1159	71.7711	54.796	68.0374	56.8908	61.9364
CI_21E	0.238979	0.104031	0.14325	0.174227	0.19235	0.123351	0.169538	77.8498	70.8063	83.8241	66.1187	79.4202	69.3229	74.4096
CI_28A	0.204047	0.101722	0.154532	0.117954	0.177878	0.0964007	0.146079	76.9472	67.7871	80.7998	62.9706	78.0773	66.2825	72.2799
CI_3A	0.291758	0.116808	0.201956	0.181953	0.245937	0.135629	0.205887	76.9472	68.9806	83.618	64.7174	78.2793	67.4941	72.9993
CI_40H	0.214405	NA	0.143478	0.177694	0.178942	0.130297	0.163897	75.1419	67.8676	74.2046	56.7353	74.0577	63.117	68.4422
CI_64	0.210517	0.106927	0.156462	0.156326	0.182242	0.11851	0.16219	78.7525	71.8725	81.5687	73.1296	78.5952	73.1698	76.1298
CI_91B	NA	0.107655	0.162876	0.176211	0.192819	0.128045	0.175727	79.6551	71.8725	82.6186	69.748	79.4802	71.5557	75.6753
CI_92	NA	0.102561	0.157859	0.168855	0.189593	0.120423	0.1675	74.2392	68.6609	76.2478	59.4685	74.0178	64.4032	69.1201
CI31A	NA	0.109818	0.155591	NA	0.188135	0.129172	0.170176	82.3631	70.6281	84.7133	NA	81.9017	68.3754	75.8517
CI90C_GOODMAN_BUCKLER	0.255027	0.0980002	0.182081	0.168626	0.21743	0.116168	0.179761	77.8498	68.5419	83.5562	65.8123	80.2026	67.651	74.0083
CL17	NA	0.122804	NA	0.197062	NA	0.149209	0.19564	57.9915	66.3965	64.744	51.1667	61.5763	59.1859	59.7694
CL18	0.176951	0.108726	NA	0.194831	0.155637	0.134709	0.163726	56.1862	57.2428	68.5682	47.4659	61.0481	52.5129	56.1208
CL27	0.196505	NA	0.263972	NA	0.219562	NA	0.192828	56.1862	71.7318	66.1274	46.5717	60.0737	64.2525	55.1069
CM105	0.240253	0.118585	0.189219	0.15645	0.2123	0.126422	0.182876	66.1153	65.0565	69.5088	54.1602	66.7517	60.9589	63.5137
CM174	NA	0.107769	0.144303	0.173764	0.180877	0.125283	0.167964	61.6021	58.7296	67.7479	52.927	63.6958	55.6694	59.1454
CM48	0.224722	NA	0.236757	NA	0.223672	NA	0.19648	57.9915	70.8063	66.9452	65.3118	61.6219	69.2146	69.1477
CM7	0.221652	NA	0.238207	0.178257	0.222591	0.131565	0.192305	56.1862	71.0884	65.6122	48.0186	60.6083	64.2525	56.0797
CM99	NA	0.105285	0.231141	0.156669	0.236709	0.116806	0.186738	62.5047	61.2102	68.6381	53.3927	64.3901	57.3588	60.3916
CML_144	NA	0.0869971	NA	0.141464	NA	0.0946218	0.150191	NA	80.1525	NA	73.3276	NA	78.597	83.1187
CML_176	0.190039	0.106781	0.160731	0.213189	0.172777	0.14223	0.170731	82.3631	75.3352	86.4435	68.6551	82.8644	72.9435	78.3275
CML_218	NA	0.10888	NA	0.175685	NA	0.129386	0.179278	83.2657	NA	NA	69.8183	82.427	72.0816	77.7723
CML_220	0.194006	0.0986896	0.151788	0.147363	0.171212	0.106721	0.147797	75.1419	66.6819	79.0352	62.4714	75.8887	64.8779	70.2164
CML_228	NA	0.0976793	0.125231	0.152479	0.168615	0.108572	0.150143	83.2657	75.7216	85.4919	69.5503	83.0815	73.4355	78.5785
CML_247	NA	NA	NA	0.191213	NA	0.138691	0.187931	NA	75.8776	NA	73.3276	NA	75.5363	80.1062
CML_277	0.187896	NA	NA	NA	0.164871	NA	0.146176	84.1684	74.8689	NA	73.4955	83.9973	75.4539	80.3947
CML_322	NA	NA	0.136315	0.162102	0.175741	0.118705	0.156797	84.1684	75.6551	84.4968	68.3447	82.8747	72.8171	78
CML_323	NA	0.0855749	0.2072	0.117946	0.221316	0.0828686	0.156299	84.1684	68.3724	87.3216	69.5503	84.152	69.5024	77.1151
CML_376	0.186861	0.106261	0.14265	NA	0.163459	0.121335	0.148472	84.1684	73.906	87.3216	NA	84.291	71.825	79.096
CML_52	NA	NA	NA	0.13523	NA	0.100193	0.151505	NA	70.8679	NA	67.1439	NA	69.8415	74.3728
CML_91	0.213161	NA	0.128328	0.158729	0.171914	0.115373	0.151716	85.9737	73.6473	NA	68.1153	84.7745	72.1116	78.4143
CO106	0.273693	0.130929	NA	0.18924	0.237262	0.15101	0.207085	58.8941	57.2199	69.111	50.1718	62.6668	54.0152	57.5841
CO117	0.229422	0.108748	0.243766	0.184872	0.229189	0.131413	0.195357	57.9915	59.5324	66.8931	55.74	61.8718	57.4373	59.0219
CO125	0.287016	0.119598	0.172903	0.199434	0.293918	0.147745	0.212128	69.7259	65.8427	67.2227	54.876	67.4219	60.6658	63.5231
CO158	0.222765	0.0963416	0.214723	0.199589	0.213369	0.129273	0.183763	61.6021	59.6033	67.1376	52.002	63.7786	55.5424	59.1169
CO192	NA	0.11454	0.207293	0.175941	0.221376	0.133335	0.189413	61.6021	61.1129	69.6548	50.9429	64.5387	56.0273	59.8204
CO216	0.243079	NA	0.182477	0.172552	0.21103	0.126397	0.182863	62.5047	71.7318	68.8264	54.1602	64.7242	64.4286	64.3394
CO236	NA	0.117165	NA	0.191546	NA	0.141329	0.192606	59.7968	58.1454	68.7229	54.7772	63.5797	56.4143	59.2711
CO237	0.195354	0.118539	0.164519	0.173476	0.177284	0.134008	0.167772	79.6551	66.6819	72.6881	58.6043	75.5998	63.2272	69.126
CO245	0.219328	0.131732	0.271943	0.189492	0.235441	0.152866	0.207518	57.9915	60.5591	66.6906	53.1264	61.916	56.6215	58.6198
CO255	0.231133	0.110755	0.235049	0.163999	0.226479	0.122928	0.188001	57.9915	58.379	66.8417	50.8623	61.8044	54.7041	57.5158
CO256	0.229314	0.100809	0.177722	0.165136	0.201474	0.116012	0.171781	82.3631	68.0757	80.866	59.6547	80.0574	65.3219	72.8122
CO257	0.220821	0.106428	0.191294	0.206927	0.20249	0.140528	0.184135	79.6551	67.3523	80.7889	62.4582	79.3812	65.4872	72.395
CO258	NA	NA	0.149729	0.136579	0.184366	0.100609	0.153916	78.7525	66.5596	81.675	62.352	79.4646	65.2013	72.3531
CR1HT	NA	0.132981	0.170621	0.169421	0.197798	0.143799	0.186917	79.6551	62.5516	68.8741	54.0726	73.0221	58.6987	65.6747
CSJ3	0.255096	0.102184	NA	0.197463	0.221571	0.133114	0.190556	58.8941	57.5312	64.7466	47.3295	61.9042	52.5255	56.2945
DE811	0.227935	NA	0.121029	0.149236	0.176977	0.110114	0.151623	79.6551	68.6609	83.5589	62.4831	80.5978	66.0889	73.4618
E2558W	0.199542	0.10029	0.12027	0.127885	0.161056	0.0993077	0.138314	76.0445	70.4379	84.5586	64.1893	78.5317	68.2006	73.5337
EAST_028	0.244775	NA	0.20667	0.244355	0.222092	0.176451	0.213623	69.7259	71.7774	72.1965	58.5152	69.9489	65.9492	67.5507
ENG_LI_CHIH	NA	0.110517	0.212735	0.158152	0.224874	0.120783	0.183887	69.7259	65.3455	70.3876	55.0243	69.8088	60.5972	64.8475
EP1	0.283441	0.104865	0.252293	0.17977	0.262445	0.127388	0.20995	61.6021	73.8871	64.8729	51.5237	62.7313	64.2525	58.264
F115	0.244437	0.118199	0.231011	0.202123	0.232099	0.146914	0.206579	67.9206	58.1454	67.068	59.3101	66.5976	58.6327	62.1505
F2834T	NA	0.109685	0.15477	0.205219	0.187607	0.14313	0.179795	82.3631	67.8487	82.6156	62.4831	81.6592	66.2244	74.1725
F431	0.270056	0.11695	0.182094	0.156946	0.225694	0.125672	0.189384	67.018	NA	73.0403	52.1787	69.5287	57.6441	63.5241
F44	NA	0.138484	NA	0.223109	NA	0.173166	0.217643	82.3631	NA	NA	74.4205	81.4639	75.8385	79.4707
F7	0.217743	0.0985657	NA	0.155951	0.190055	0.110099	0.162367	56.1862	57.22	66.8931	50.8508	61.1403	54.0964	56.8024
FBHJ	0.195615	NA	0.157664	0.155346	0.174557	0.112867	0.152434	72.4339	71.7318	81.0538	58.1759	75.3407	66.049	70.659
FC46	0.314093	0.0943039	0.225557	0.133084	0.268094	0.0965382	0.169931	65.2127	NA	67.6975	55.2617	65.0694	59.6873	61.1573
FR19	0.218871	0.0996732	0.167544	0.140484	0.191473	0.104735	0.157122	69.7259	64.2952	77.154	58.7334	72.6083	62.0413	67.1961
G22_T122	0.29082	NA	0.248194	0.203468	0.264783	0.148439	0.227694	57.9915	NA	66.0523	51.0392	60.8006	56.064	56.5065
G3_T5A	0.209644	0.120882	0.254876	0.165648	0.222973	0.129304	0.19008	57.9915	57.0427	66.833	46.7029	61.4641	52.003	55.8354
G80	0.194048	0.111416	0.14236	0.175783	0.167287	0.128998	0.15831	70.6286	64.7909	71.4599	57.8982	70.3907	62.2128	66.2012
GE54	NA	0.123277	NA	0.144325	NA	0.123855	0.173652	85.9737	69.2968	86.035	65.6536	84.8779	67.895	76.7388
H110	0.189211	0.117883	0.155503	0.179268	0.170132	0.136522	0.162774	77.8498	68.0692	83.4238	62.3203	79.3604	66.2797	73.0313
H113	NA	0.115172	0.170764	0.183211	0.19789	0.13708	0.180551	82.3631	65.8427	73.2712	58.8327	75.9839	62.8928	69.2803
H114	0.260629	0.0958824	0.170186	0.150355	0.215527	0.10637	0.174203	70.6286	68.1928	76.3507	62.0648	71.9359	65.9396	68.5257
H121	0.197791	0.105452	0.159507	0.161687	0.176524	0.119391	0.157777	75.1419	66.0652	78.1805	60.6141	75.4821	63.9272	69.6477
H122W	0.211301	0.112388	0.142796	0.193906	0.176951	0.139151	0.16899	78.7525	68.824	82.7445	68.6984	79.8778	69.5858	75.1404
H124W	0.194158	0.09434	0.137385	0.128896	0.165264	0.0935966	0.138443	77.8498	67.8101	81.8915	62.4582	78.5046	66.1337	72.5687
H14	NA	NA	0.143961	0.195076	0.180657	0.142055	0.175462	79.6551	75.1569	81.139	67.0245	79.1736	72.1934	75.8572
H49	0.267745	0.146007	0.224185	0.194021	0.24205	0.165127	0.222765	74.2392	70.977	78.4578	60.1031	75.3138	66.7414	70.6855
H5	0.243344	0.106876	0.170704	0.200258	0.206245	0.136171	0.18377	70.6286	66.6819	71.5103	60.7204	70.2889	64.4764	66.9997
H52	NA	0.121509	NA	0.170357	NA	0.134087	0.181218	NA	75.3581	NA	73.0172	NA	75.2322	79.9495
H71	0.200285	NA	0.1638	0.168064	0.179692	0.124343	0.160047	78.7525	66.7888	78.8558	60.1671	77.7918	64.263	70.907
H84	0.197157	0.10787	0.138733	0.18869	0.167477	0.134455	0.161672	74.2392	64.5329	74.9215	60.1671	73.1848	63.1556	67.9009
H8431	0.239192	NA	0.177404	0.138138	0.20677	0.101962	0.168936	69.7259	65.9284	71.3282	58.1776	70.2519	62.4944	66.1408
H91	0.222964	NA	0.161841	0.140652	0.191335	0.104922	0.15947	76.9472	NA	82.8234	62.0361	78.5232	65.7912	72.7976
H95	0.246053	0.104342	0.186035	0.174984	0.214154	0.124772	0.181755	76.0445	69.4157	79.7964	61.9156	77.1336	66.0173	71.4355
H96	0.266214	0.125421	0.117885	0.160873	0.196695	0.132705	0.177977	77.8498	68.2984	81.6026	61.5237	78.6915	65.9082	72.2997
H99	NA	0.0951009	0.196123	0.208052	0.214194	0.130717	0.187186	73.3366	67.4367	76.5766	58.6799	73.9042	63.66	68.3491
HBA1	0.234528	0.100738	NA	0.159813	0.204217	0.113765	0.168587	82.3631	69.2968	68.7229	64.1893	74.428	67.4213	70.9409
HI26	NA	0.0901908	0.154029	0.16304	0.18713	0.106009	0.155429	82.3631	75.3581	85.5691	68.1153	82.3084	73.1686	78.0131
HI28	NA	NA	0.157894	0.179148	0.189615	0.129575	0.174913	79.6551	70.8063	81.8066	69.8939	79.1736	71.1086	75.1759
HP301	0.238941	0.122174	0.196745	0.175102	0.21473	0.13746	0.189951	76.9472	66.034	75.4107	61.6362	74.8728	64.6403	69.7335
HP72_11	NA	0.0989489	NA	0.199849	NA	0.130406	0.179294	79.6551	71.245	84.4244	66.7488	80.8062	69.7675	75.4536
HUANYAO	0.216599	0.109926	0.167004	0.146844	0.189999	0.115453	0.164965	69.7259	66.4014	76.2391	62.0743	71.8486	64.6113	68.2157
HUOBAI	NA	NA	NA	0.229203	NA	0.165428	0.208855	84.1684	71.1927	85.0092	65.2617	82.5622	69.2907	76.1342
HY	0.21978	0.105483	0.169588	0.188899	0.192829	0.131674	0.174016	73.3366	66.0652	79.296	62.5003	75.1852	64.6833	69.7698
I_205	0.221999	0.0970243	0.128066	NA	0.176661	0.111359	0.153357	77.8498	65.2066	85.4992	NA	79.796	62.5657	72.5015
I159	0.229942	0.0927485	NA	NA	0.200348	0.107483	0.164659	83.2657	81.2995	NA	69.2792	82.7353	77.0275	81.2253
I29	NA	0.113988	0.184839	0.195359	0.206939	0.140725	0.188542	69.7259	59.7729	72.3343	53.5051	70.24	57.189	63.3582
IA453	0.225812	0.0867766	0.175058	0.156396	0.198434	0.102542	0.161851	69.7259	63.0548	72.8664	55.5721	70.6835	59.4959	64.9203
IA5125B	0.295762	0.107558	0.195672	0.20052	0.245506	0.137041	0.20694	63.4074	61.7488	69.5125	56.4693	65.9449	59.1993	62.1173
IB014	0.224309	0.114697	0.165031	0.2186	0.19341	0.152535	0.18625	78.7525	65.2877	74.418	58.0652	74.8519	62.4034	68.2923
IB02	0.233552	0.108103	0.17983	0.187029	0.204686	0.133987	0.181159	67.9206	61.5705	71.2558	54.0726	68.5502	58.3419	63.1336
IDS28	0.217202	NA	0.19859	0.218282	0.203557	0.158659	0.191594	73.3366	NA	78.0414	60.6313	74.3819	64.3638	69.1955
IDS69	0.236523	NA	NA	NA	0.2059	NA	0.180591	75.1419	74.9847	79.4507	NA	76.1318	72.8152	73.6954
IL_101T	NA	NA	0.199042	0.128352	0.216071	0.0962073	0.166455	68.8233	71.1927	70.4494	54.5601	68.2182	64.1083	66.0848
IL14H	NA	0.106414	0.192237	0.170568	0.211696	0.124114	0.181751	70.6286	62.6742	72.4005	56.7353	70.2483	60.0438	64.8059
IL778D	NA	0.120787	0.208967	0.194573	0.222452	0.146211	0.197819	80.5578	66.5975	76.8995	62.2277	77.6384	64.5381	70.9909
INBRED_100	NA	NA	NA	0.230855	NA	0.166886	0.211544	82.3631	74.1076	85.3051	70.6637	82.1748	73.5628	78.194
INBRED_109	NA	0.104053	NA	0.187974	NA	0.12995	0.179814	82.3631	68.6609	85.6452	68.6551	81.9247	68.855	75.5761
INBRED_141	0.212363	0.105778	0.14865	0.170787	0.179986	0.12354	0.163063	78.7525	67.3523	82.7445	61.1791	80.0021	64.6135	72.4014
INBRED_305	NA	0.126142	0.169707	0.16926	0.19721	0.138307	0.18399	68.8233	68.59	75.4107	61.6362	71.2737	65.9341	68.6305
INBRED_309	NA	0.1251	0.170136	0.159722	0.197486	0.13402	0.179913	68.8233	NA	77.1797	62.0743	71.7687	65.074	67.9114
K148	0.256597	0.0978092	0.177726	0.196294	0.216468	0.128949	0.188698	75.1419	62.6742	77.0264	62.352	75.1505	62.6438	68.7726
K150	0.226763	0.117059	0.176694	0.159774	0.199642	0.125897	0.17415	73.3366	67.8101	80.3983	62.5003	75.0625	65.9029	70.6173
K155	NA	NA	0.232312	0.215569	0.237461	0.156737	0.213937	82.3631	71.3176	86.5601	66.2383	83.4456	69.6569	76.8894
K201	0.236702	0.0965132	0.165643	0.18906	0.200476	0.123496	0.175542	76.9472	75.6172	82.5093	69.8939	78.8821	74.088	76.8883
K4	NA	0.090851	0.200488	0.152912	0.217001	0.103657	0.169267	NA	68.3069	NA	65.0567	NA	67.4566	71.7872
K41	0.262358	0.125191	0.15455	0.15673	0.20993	0.131963	0.184358	77.8498	68.3069	76.0858	62.2277	75.685	66.0625	70.6749
K47	0.22801	NA	NA	0.160768	0.198718	0.118174	0.171175	77.8498	66.6832	82.0427	60.2053	78.4126	63.7184	70.9924
K55	0.256334	0.118842	0.165046	0.220197	0.211015	0.157578	0.198508	76.9472	67.6089	80.0617	67.7639	77.3977	68.177	73.0562
K64	0.22061	0.103628	0.131335	0.162276	0.177267	0.117098	0.158183	79.6551	75.1657	82.0942	69.8567	79.9502	73.8272	77.0556
KI11	0.209284	0.114798	NA	0.158904	0.182917	0.124879	0.166643	NA	81.0244	NA	69.9763	NA	77.0289	81.5131
KI3	0.209551	0.102706	NA	0.137323	0.183143	0.104089	0.153117	84.1684	73.906	89.3819	69.7037	85.0627	72.6843	79.1829
KI43	NA	0.103988	NA	0.148592	NA	0.109664	0.160095	84.1684	73.906	NA	68.1964	82.6151	72.3249	77.7683
KO679Y	0.188853	0.0993305	0.136174	0.164873	0.161842	0.114254	0.14754	77.8498	67.6176	84.1607	68.823	78.8382	68.8573	73.9878
KUNG_70	0.257822	0.0960557	0.189099	0.124103	0.221904	0.0932368	0.169684	82.3631	67.8101	77.9155	62.272	78.2382	65.6718	72.0526
KY21	NA	0.0912362	0.130205	0.144224	0.171813	0.0996972	0.143551	79.6551	75.3581	83.6878	69.5121	80.5934	73.7736	77.7249
KY226	NA	0.105648	0.158425	0.180731	0.189957	0.128424	0.173825	79.6551	73.8871	83.8756	69.828	80.6498	73.0015	77.1923
KY228	NA	0.112796	NA	0.200883	NA	0.143583	0.19287	85.9737	71.8725	84.4995	67.0532	84.2651	70.3178	77.2992
L_289	0.25489	0.128721	NA	0.204254	0.221397	0.155819	0.204507	74.2392	NA	80.1984	57.8982	76.0286	62.5045	69.3915
L317	0.233542	NA	0.151597	0.166291	0.192858	0.122127	0.167632	78.7525	70.8679	81.6776	61.3858	79.3402	67.4476	73.3265
LH1	0.194458	0.109073	0.147909	0.16061	0.169836	0.121009	0.157419	77.8498	67.0804	78.5171	61.8032	76.0322	64.8047	70.3594
LH123HT	0.177238	0.100176	0.140929	NA	0.15745	0.116037	0.142263	77.8498	68.9476	83.6851	70.8284	79.6095	70.2711	74.9413
LH145	0.234982	0.0937694	0.150412	0.153889	0.193153	0.106095	0.160656	65.2127	64.5556	73.6523	59.2728	68.3035	62.2342	64.7519
LH149	0.246348	NA	0.178579	0.148435	0.211194	0.108678	0.175511	67.018	NA	71.696	54.7517	68.2882	59.1133	63.164
LH38	0.229442	0.0954494	0.136044	0.176548	0.184092	0.117444	0.163434	75.1419	64.5244	74.2155	58.3268	73.7664	62.1048	67.6248
LH39	NA	0.12627	NA	0.210761	NA	0.158567	0.203059	74.2392	65.3192	76.0858	58.6427	74.6414	62.2071	68.2592
LH59	0.220987	0.0916301	0.125687	0.14959	0.175109	0.10368	0.14944	70.6286	66.5975	75.5335	62.3423	72.2343	64.6981	68.1904
LH60	0.189978	NA	0.127048	0.156565	0.158638	0.114933	0.142035	82.3631	70.8868	85.8051	62.5003	82.8216	67.6546	75.5584
LH61	0.216813	0.109519	0.180742	0.151779	0.195869	0.118319	0.168844	66.1153	61.5705	71.39	56.6207	67.2583	59.264	62.9817
LH82	0.202462	0.100001	0.153405	0.196545	0.176536	0.130179	0.163892	68.8233	60.5212	76.5766	58.4897	71.7624	59.7885	65.3986
LH93	0.222299	0.105364	0.145414	0.133657	0.184091	0.105412	0.155103	79.6551	71.245	79.2209	62.5003	77.7031	67.7952	72.924
LP5	0.196097	0.0931142	0.151853	0.145134	0.172388	0.102102	0.146629	69.7259	60.7815	71.5962	57.2431	69.4249	58.9918	63.8219
M14	0.261463	NA	0.202713	0.191113	0.229606	0.138052	0.203482	76.9472	71.3176	80.339	62.4179	77.6651	67.7628	72.591
M162W	0.207049	NA	0.148541	0.148675	0.17702	0.107941	0.151514	84.1684	71.1927	83.45	72.8689	82.5284	72.846	77.8906
M37W	NA	0.113266	NA	0.191426	NA	0.138833	0.18899	82.3631	69.6081	84.1015	65.2617	82.305	68.4804	75.5345
MBNA	0.203502	0.129181	0.116504	0.194788	0.161655	0.151659	0.169964	68.8233	65.8113	72.8734	58.5152	69.2661	63.1141	65.817
MBPM	0.188057	0.0880674	0.150622	NA	0.167455	0.101191	0.14297	73.3366	66.4014	79.7967	59.5168	75.5777	63.7979	69.6654
MEF156_55_2	NA	0.103519	0.186214	0.177909	0.207823	0.124877	0.176931	61.6021	60.5591	67.5688	51.2943	63.5435	56.1625	59.0916
MO_G	NA	0.115735	0.185989	0.198851	0.207679	0.143677	0.190694	78.7525	68.9806	NA	63.0914	77.8151	66.7047	72.4731
MO15W	NA	0.124242	0.171538	0.192433	0.198387	0.148745	0.190668	77.8498	66.4938	81.8915	62.0361	78.2757	64.7432	71.6494
MO17	0.222609	0.108438	0.155565	0.171941	0.188511	0.126868	0.167785	73.3366	64.0747	76.6358	60.3194	72.7298	61.898	67.2472
MO23W	NA	0.124012	0.197134	0.186957	0.214844	0.144796	0.193629	84.1684	74.7042	86.6974	71.8281	83.7434	74.5128	79.6976
MO24W	NA	0.115375	0.155317	NA	0.187959	0.132347	0.171166	84.1684	68.5649	79.296	NA	80.5595	66.3071	74.3188
MO28W	0.216239	0.103334	0.141076	0.16482	0.178944	0.118921	0.160599	77.8498	71.487	82.7445	65.8028	79.2184	69.8735	74.6267
MO3	0.237475	0.102808	0.157062	NA	0.197307	0.118645	0.171331	77.8498	70.3401	83.5592	73.0172	79.5678	72.6518	76.3521
MO30W	0.233305	NA	0.177964	0.206582	0.203769	0.150402	0.190695	73.3366	NA	77.9743	62.9066	74.1271	66.6504	70.0588
MO39	NA	0.128435	0.151178	0.169395	0.185297	0.140797	0.177804	84.1684	66.7973	85.7054	62.3203	82.874	65.4793	74.1567
MO44	NA	0.105655	NA	0.220985	NA	0.146623	0.192613	77.8498	66.2034	75.1452	57.8982	75.5932	63.1239	69.2724
MO45	NA	0.112578	NA	0.1524	NA	0.119694	0.170711	82.3631	66.7888	81.2796	60.5117	80.7066	64.2085	72.3292
MO47	0.205928	0.107045	0.199648	0.169786	0.197804	0.123358	0.173836	69.7259	65.3455	71.1959	58.0652	69.6577	61.9677	65.4839
MO5	NA	0.131337	0.167769	0.173621	0.195964	0.14536	0.18519	84.1684	68.4678	84.8168	62.9706	82.9411	66.726	75.2389
MO7	0.219291	0.0982851	0.173315	0.153477	0.194121	0.109463	0.163443	77.8498	66.1003	78.6839	60.6141	77.2703	63.8204	70.5703
MP339	NA	0.0996386	0.166436	0.165961	0.195107	0.116517	0.167133	84.1684	70.7322	NA	60.403	82.5972	66.5829	74.0774
MS106	NA	NA	0.144774	0.150015	0.18118	0.109502	0.15639	70.6286	71.1927	73.6287	59.3101	71.9046	66.2063	68.9817
MS116	0.21796	0.0993833	0.171626	0.178951	0.192682	0.121009	0.168593	64.31	61.1178	68.6885	55.1134	65.2135	58.716	61.4176
MS12	0.240958	0.121769	0.1794	0.20529	0.208576	0.149599	0.192748	64.31	60.3196	73.6141	55.0323	68.2516	58.1185	62.6275
MS132	0.255695	NA	0.203879	0.156619	0.226925	0.115003	0.190957	79.6551	68.0985	77.3911	61.9721	77.5886	65.988	71.6572
MS142	0.263336	NA	0.211863	0.203594	0.234467	0.147342	0.207519	65.2127	65.5843	72.6735	55.74	68.1487	61.4258	64.2738
MS153	0.203162	0.0961351	0.150122	0.169974	0.175545	0.114271	0.155694	65.2127	61.3983	68.5682	54.0477	65.0929	58.2683	61.1912
MS211	0.262619	0.126288	NA	0.235406	0.227918	0.169861	0.219332	65.2127	62.0601	72.4005	56.4673	68.0201	59.3607	63.4708
MS221	0.218712	0.0914553	0.149379	0.147752	0.18378	0.101263	0.153364	75.1419	65.5227	75.3586	59.4685	74.0317	63.0443	68.3075
MS222	0.213586	0.0923607	0.183791	0.15629	0.195373	0.106197	0.162283	80.5578	66.8551	77.4843	65.2749	77.2786	66.1111	71.5305
MS223	0.208249	0.0954682	0.156906	0.169706	0.181182	0.114188	0.159964	68.8233	66.1003	72.7813	59.4242	69.5953	62.974	65.9831
MS224	0.258974	0.105716	0.163085	0.149506	0.211644	0.113059	0.175557	70.6286	64.4188	78.0414	61.1791	73.9877	63.1214	68.3891
MS225	0.227275	0.103705	0.160782	0.158747	0.19326	0.117331	0.167063	74.2392	65.8341	73.1032	57.8106	72.8744	62.6298	67.7837
MS226	NA	0.123649	0.144358	0.146834	0.180912	0.126165	0.16665	82.3631	69.4157	80.7344	62.0763	80.4795	66.1645	73.2021
MS24A	0.232027	0.140228	0.246552	0.250424	0.231787	0.18707	0.226377	63.4074	61.2102	69.767	53.9098	65.9519	57.7818	61.5641
MS67	0.213935	NA	0.1843	0.183997	0.195778	0.134368	0.175716	73.3366	66.3965	71.222	56.8933	71.0066	61.9814	66.2653
MS72	0.246371	0.109761	0.18031	0.21053	0.211931	0.144836	0.191424	70.6286	65.3192	72.0997	56.3069	71.0165	61.1643	65.8492
MT42	0.272399	0.118235	0.277723	0.201081	0.267025	0.146544	0.225041	59.7968	58.2633	66.6279	52.7198	63.0728	56.2126	58.6851
N193	0.237799	0.105784	0.199648	0.198341	0.215319	0.135998	0.192526	66.1153	62.0601	68.4002	54.9419	66.8693	58.839	62.5356
N199	0.253677	0.0962446	0.213124	0.150476	0.229687	0.106155	0.180819	76.0445	68.2984	80.9508	68.4571	76.7474	68.829	72.9681
N209	0.220609	0.102401	0.121561	0.13002	0.173174	0.102552	0.147886	76.0445	69.5853	77.1036	62.9706	75.3954	67.656	71.6723
N215	0.220701	0.0957705	0.145846	0.156586	0.183393	0.107976	0.155812	77.8498	65.6032	83.999	61.9156	79.4694	64.1739	71.7878
N216	0.292459	0.0956732	0.127751	0.137861	0.215249	0.100477	0.168745	76.9472	67.5836	82.8835	68.1964	78.3803	68.3464	73.3361
N217	0.237315	0.101583	0.154694	0.142151	0.196228	0.10699	0.162837	82.3631	70.4379	85.8803	67.7639	82.857	69.7382	76.6829
N218	0.205199	0.0880403	0.120855	0.137481	0.16441	0.0928613	0.137783	76.9472	67.6176	79.9758	64.3773	77.3317	67.0867	72.2369
N28	0.228094	NA	0.187225	NA	0.204783	NA	0.179693	76.0445	71.7774	84.8168	NA	79.452	69.1417	74.7838
N28HT	0.235312	0.094523	0.175135	0.171941	0.203687	0.107982	0.170121	73.5385	66.8179	79.6614	60.3194	76.7878	64.2525	71.8627
N501	0.212566	0.0977164	0.140275	0.144555	0.17659	0.104544	0.150745	69.7259	66.0652	77.3396	58.1759	72.4959	62.6136	67.3302
N527	0.226983	0.11161	0.1875	0.146811	0.204288	0.116391	0.17481	74.2392	65.3455	73.5295	62.0648	73.0881	64.0988	68.3565
N534	0.247243	0.109601	0.18022	0.189589	0.212373	0.135471	0.18739	74.2392	65.2877	75.1452	58.8327	73.4287	63.0907	67.8349
N538	0.213584	0.107737	0.13788	0.153501	0.176147	0.11692	0.155414	78.7525	65.8048	80.8633	63.4176	78.7078	65.4986	72.1965
N542	0.222928	0.0884457	0.14447	0.12798	0.184041	0.0905763	0.146861	76.0445	67.6089	78.0442	61.6549	75.5559	65.5369	70.362
N545	NA	0.0971879	0.125735	0.128945	0.168939	0.0986981	0.141014	NA	66.074	84.9014	62.4831	81.009	64.6886	72.0865
N6	0.208378	0.118173	0.146334	0.191513	0.176825	0.142957	0.173042	70.6286	65.8341	78.0414	59.4242	73.7932	63.1099	68.3098
N7A	0.255734	0.122433	0.191848	0.188488	0.221908	0.144092	0.200079	76.9472	68.59	80.3061	62.352	77.2201	65.9179	71.502
NC13	NA	0.113052	0.153793	0.167333	0.186979	0.126988	0.169285	79.6551	70.0515	85.0092	69.9763	80.9735	70.792	76.0436
NC222	NA	0.111676	0.154983	0.160946	0.187743	0.122632	0.16737	79.6551	73.6561	NA	69.1122	79.9445	72.9326	77.3676
NC230	0.224593	0.125763	0.189561	0.206468	0.203838	0.154829	0.193644	80.5578	69.2226	84.6285	68.6551	80.5441	69.7082	75.4859
NC232	0.196692	0.0917836	0.161724	0.137525	0.176848	0.0967336	0.146367	79.6551	69.2226	82.6186	64.7174	79.0766	67.8394	73.6565
NC236	NA	0.109479	0.172212	0.209222	0.198821	0.142898	0.184693	82.3631	70.132	86.4398	67.1556	82.4221	69.5514	76.4982
NC250	0.184746	0.104751	0.148855	0.136043	0.164895	0.106125	0.146163	76.9472	68.7126	82.2203	66.0195	78.9496	67.8698	73.2867
NC264	0.225112	0.114263	0.166365	NA	0.194409	0.134448	0.175242	76.0445	66.0993	79.4577	58.2341	76.1141	63.0265	69.532
NC298	NA	0.111259	NA	0.257449	NA	0.168014	0.213556	68.8233	67.6089	NA	65.8516	70.7275	67.298	70.0346
NC318	NA	0.0992062	NA	0.154835	NA	0.11004	0.160917	82.3631	73.6561	85.8803	68.3447	83.0216	72.2453	77.9659
NC340	0.212232	0.11648	0.160822	0.171985	0.18501	0.131448	0.171235	77.8498	70.0516	85.365	65.8123	80.3458	68.2347	74.398
NC342	NA	0.108078	0.183135	0.207608	0.205844	0.141454	0.190119	74.2392	67.0804	78.9149	65.8143	75.3316	66.733	71.0084
NC344	NA	0.107235	0.148717	0.150627	0.183715	0.115303	0.161506	84.1684	72.364	84.3644	68.8618	82.6084	71.4178	77.2844
NC356	NA	0.122453	0.15075	0.178197	0.185022	0.138566	0.178858	77.8498	71.3176	82.8835	65.0567	78.7905	69.0062	73.8369
NC358	0.238545	0.120847	0.158941	0.152625	0.198682	0.126333	0.176279	75.1419	67.6099	73.5289	62.3807	73.5157	65.3182	69.3733
NC412	NA	0.08876	0.178443	0.156366	0.202827	0.104426	0.161502	74.2392	67.8487	75.8621	65.3742	74.2685	67.7119	70.7842
NC472	0.203781	0.0915282	0.169421	0.131527	0.183967	0.0939848	0.150492	75.1419	68.7126	80.2129	63.0108	76.9193	66.5539	71.6126
ND1	NA	NA	NA	0.161866	NA	0.11795	0.168702	56.1862	56.2215	67.5688	48.0588	61.0875	52.1746	55.8319
ND101	NA	0.129139	NA	0.189039	NA	0.15041	0.195512	54.3809	56.2301	66.1274	47.5194	59.5255	51.9558	54.762
ND167	0.305326	NA	NA	0.200327	0.263951	0.145027	0.222661	59.7968	60.5591	66.0892	52.002	62.3659	56.1645	58.3874
ND230	0.247946	0.113975	0.23778	0.222578	0.236862	0.152566	0.210695	57.9915	59.6082	67.2227	52.1787	61.9608	56.4872	58.7566
ND246	0.252888	0.1084	0.196824	0.153556	0.222428	0.116705	0.183435	59.7968	57.6063	66.9452	51.0392	62.4299	54.2605	57.6407
ND247	0.26082	0.0967786	0.20402	0.173206	0.2298	0.11711	0.188438	66.1153	61.042	71.3309	56.6207	68.1121	58.7365	62.7008
ND251	0.264311	0.0959547	0.243236	NA	0.248139	0.110794	0.203396	62.5047	59.5324	69.111	NA	64.5799	56.3334	59.645
ND260	NA	0.127195	0.252712	0.18246	0.250577	0.144124	0.210974	62.5047	59.923	66.9446	51.8341	64.0992	56.0984	59.7628
ND262	0.295417	0.148475	0.26788	0.241191	0.275553	0.190244	0.252197	58.8941	62.0601	69.111	50.8221	62.7686	57.1078	59.5503
ND265	0.241367	0.133397	0.201616	0.195878	0.218104	0.156379	0.200807	66.1153	64.4188	68.9256	55.7788	67.6223	60.6942	63.743
NO__380	0.22376	NA	0.171897	0.136268	0.195983	0.100856	0.160469	57.9915	59.2407	66.6906	50.1718	61.9155	55.0908	58.005
NP87	0.265684	0.107787	NA	0.265152	0.230504	0.210254	0.244508	74.2392	67.4367	79.1725	62.0361	75.3923	65.4661	70.4018
NY6371	NA	0.112119	0.18314	0.166678	0.205847	0.126259	0.18198	76.9472	70.0996	77.2913	59.1686	76.0756	65.5941	70.6971
OC19	NA	NA	0.203054	0.16056	0.21865	0.119027	0.180993	74.2392	70.6369	79.9226	60.1671	76.1977	66.8074	71.5544
OH33	NA	0.100643	0.170756	0.178825	0.197884	0.122114	0.171529	73.3366	68.9463	74.5929	60.3587	72.9565	65.278	68.9481
OH40B	NA	NA	0.162294	0.194254	0.192444	0.140277	0.182669	82.3631	71.7774	77.978	60.5489	79.0088	66.9165	73.0387
OH43	0.207546	0.101123	0.156391	0.142679	0.18058	0.107216	0.154775	74.2392	64.9386	81.1021	59.6679	76.2741	62.5788	69.1172
OH7	NA	0.13033	0.168942	0.194255	0.196718	0.153392	0.192704	82.3631	70.977	85.3051	71.8281	82.5166	72.2262	77.8486
OH7B	NA	NA	NA	0.189215	NA	0.137571	0.185093	83.2657	71.3488	NA	65.9657	82.427	69.2708	75.5977
OS420	NA	NA	NA	0.121119	NA	0.0891373	0.147139	70.6286	66.6832	68.7142	65.0567	68.8687	66.2087	67.2041
OS426	0.262227	0.125264	0.200562	0.215481	0.229125	0.158479	0.208682	76.9472	64.3995	79.1731	58.9997	76.3467	62.0297	69.1168
P39	0.259619	0.0991438	0.201281	0.152123	0.227993	0.1081	0.181586	67.9206	65.5228	72.8664	56.9013	69.6435	61.8397	65.4773
PA392	0.24842	0.104299	0.171619	0.169282	0.209418	0.121883	0.17818	62.5047	61.5705	72.1965	56.3069	66.6628	59.2391	62.5151
PA405	0.25494	0.108909	0.175132	0.169292	0.214472	0.124136	0.181873	64.31	70.8293	69.4497	56.7737	66.7457	64.876	65.4552
PA468	0.254022	0.136383	0.169467	0.183422	0.211595	0.152354	0.196184	74.2392	65.6466	74.4701	58.0652	72.7599	62.4906	67.4559
PA762	0.24458	0.105985	NA	0.133289	0.212698	0.105698	0.16874	85.071	66.7162	77.154	60.1958	79.7308	64.2224	71.9027
PA778	NA	0.0994333	0.140192	0.152133	0.178234	0.110358	0.154194	78.7525	66.8288	74.3321	58.3383	75.5882	62.9956	69.1576
PA880	0.290066	0.108221	0.158994	0.145209	0.227017	0.113007	0.183014	75.1419	71.245	77.9743	61.6362	74.8006	67.6422	71.2913
PA891	0.266262	0.0930394	0.14927	0.144278	0.209864	0.101022	0.166962	79.6551	68.0692	83.6216	63.2065	80.2358	66.4658	73.5066
PHG29	NA	0.111299	0.150956	0.134922	0.185155	0.109876	0.157012	68.8233	65.1723	73.4774	61.347	69.776	63.5366	66.2406
PHG35	0.219777	0.0940677	0.149177	0.161031	0.184281	0.108992	0.157121	76.9472	74.2312	74.5693	63.5239	75.2882	70.2032	72.6923
PHG39	NA	0.096176	0.198261	0.149543	0.215568	0.104218	0.167314	82.3631	70.132	79.2723	64.7174	79.5598	68.2378	73.9688
PHG47	0.221738	0.101062	0.152616	0.143702	0.186798	0.106437	0.159759	67.9206	65.5228	79.2577	54.4961	72.983	60.7133	66.5161
PHG50	0.204951	0.1083	0.164875	0.162729	0.182707	0.12076	0.161622	75.1419	64.2952	79.4577	58.5435	75.2134	62.0265	68.5166
PHG72	0.213611	NA	0.161592	0.154982	0.186091	0.112718	0.160176	64.31	70.3401	70.7554	55.0323	66.892	64.3981	65.273
PHG80	0.212963	0.0995328	0.173074	0.172015	0.190543	0.118337	0.165521	71.5313	63.8436	72.6366	59.1121	70.9485	62.0883	66.288
PHJ40	0.209224	0.114377	0.182777	0.177416	0.192551	0.133578	0.176842	63.4074	61.1129	68.5719	52.6271	65.1259	57.0669	60.4801
PHK76	0.231226	0.101886	0.136382	NA	0.185214	0.116721	0.161401	64.31	63.8436	69.6291	58.5152	66.1774	61.8232	63.4783
PHN11	0.188762	0.108923	0.162126	0.159826	0.172659	0.121457	0.158724	64.31	65.8427	67.9335	56.3651	65.2565	61.6684	62.9783
PHR36	0.191071	0.105035	0.155415	0.13668	0.171118	0.106943	0.148905	72.4339	67.1513	73.5289	58.7703	71.4437	63.4991	67.1908
PHT55	NA	NA	NA	0.148965	NA	0.108758	0.163135	82.3631	70.8063	NA	64.9171	81.1085	68.8226	74.7937
PHT77	NA	NA	0.162525	0.19528	0.192593	0.142871	0.180733	76.9472	NA	73.7219	57.4844	73.6817	61.6165	67.8963
PHV63	0.201725	0.119037	0.130304	0.148919	0.166457	0.123467	0.15549	78.7525	69.2968	84.8645	62.0361	80.6439	66.4241	73.7574
PHW17	NA	0.098045	0.175013	NA	0.200622	0.115198	0.169416	73.3366	65.3445	77.2913	65.1842	74.5977	65.5876	70.0745
PHZ51	0.255264	0.0947605	0.141997	0.154054	0.200775	0.105693	0.164828	79.6551	68.2984	76.9749	60.7204	76.7643	65.4841	71.0575
R101	NA	NA	0.189725	0.172888	0.21008	0.125759	0.180999	79.6551	70.6281	81.8828	59.2728	79.4115	65.934	72.573
R113	0.229781	NA	0.210085	0.179416	0.215283	0.130154	0.188018	74.2392	66.4938	78.3317	58.7202	75.1732	63.2934	69.1604
R134	NA	0.103589	NA	0.12985	NA	0.101549	0.154637	75.1419	67.8676	79.0352	60.403	76.1937	64.7706	70.621
R168	0.240465	0.118841	0.1599	0.159841	0.200139	0.127759	0.178772	72.4339	66.3256	73.2712	55.5721	71.386	61.4647	66.2788
R177	0.194896	0.112151	0.140878	0.183638	0.167132	0.133354	0.162995	73.3366	63.8436	78.6839	58.2341	74.574	61.9809	68.0136
R181B	NA	0.083632	0.211158	0.162383	0.223861	0.102108	0.168369	70.6286	64.2952	76.6289	58.0652	72.2228	61.8773	66.908
R197	NA	0.102442	NA	0.169025	NA	0.118703	0.168985	82.3631	66.7162	76.034	58.7703	78.7607	63.5649	71.0986
R225	0.255871	0.118223	0.155739	0.184052	0.206863	0.140293	0.186195	77.8498	66.8288	76.0858	61.2224	76.3778	64.3543	70.5489
R226	0.209167	0.116343	0.171857	0.21504	0.187947	0.152045	0.182172	82.3631	69.0932	84.1607	63.4428	80.9888	66.9624	73.9516
R227	NA	0.0992674	NA	0.131224	NA	0.0995276	0.154357	76.9472	67.4367	81.5426	62.9066	78.3212	65.9454	72.0522
R229	0.178441	NA	0.138329	0.162765	0.157023	0.118587	0.143008	76.9472	68.1928	80.737	69.5523	77.594	69.2739	73.174
R30	0.252294	0.123149	0.157712	0.191205	0.205723	0.14601	0.189088	74.2392	69.5853	76.3507	62.3203	74.4431	67.3269	70.8911
R4	0.227084	0.117354	0.165898	0.145734	0.195298	0.120368	0.168857	76.9472	66.358	78.9848	62.9706	76.7477	65.3558	71.2738
R53	0.330492	0.10432	0.226084	0.179675	0.277326	0.126086	0.190855	63.4074	59.4102	68.5682	52.9082	64.2545	56.436	59.8421
R71	NA	0.103753	0.188274	0.180032	0.209148	0.124521	0.178824	79.6551	67.8101	78.0946	60.3842	77.5899	64.8101	71.1466
S_56	NA	0.112004	NA	0.220471	NA	0.151345	0.197695	54.3809	56.116	67.1376	46.2704	60.2707	51.178	55.1004
S8324	0.228813	0.0925522	0.153678	0.12362	0.191131	0.0905428	0.14997	65.2127	61.8292	73.0403	56.8644	68.1967	59.4618	63.2539
SD101	0.216772	0.106893	0.179349	0.144305	0.195263	0.111645	0.165633	73.3366	70.0515	77.7802	60.1958	74.7194	66.335	70.2982
SD102	NA	NA	0.124397	0.187162	0.168079	0.136446	0.163947	74.2392	72.1124	73.2125	58.534	72.762	66.0979	69.4749
SD107	0.198857	0.105858	0.166416	0.163889	0.180003	0.120468	0.16293	79.6551	66.3256	77.3911	60.2879	77.681	63.6702	70.6964
SD15	0.20138	NA	0.154004	0.161837	0.176192	0.118504	0.156856	74.2392	60.0609	70.5954	52.927	70.7979	56.6561	63.313
SD40	0.190551	NA	0.148105	0.138655	0.167771	0.102457	0.14346	71.5313	65.6032	75.9251	59.5772	72.8575	63.0905	67.8661
SD42	0.19052	0.110471	0.138229	0.203887	0.163618	0.142429	0.164472	73.3366	62.0687	76.034	58.5152	74.1303	60.1842	66.6055
SD44	0.244351	0.109875	0.221218	0.210807	0.227951	0.144823	0.200546	67.9206	60.5212	71.3282	54.5983	69.0246	57.8079	63.1489
SG_1533	0.273029	0.139761	0.221446	0.227415	0.243806	0.176229	0.227712	76.0445	71.3261	77.9125	63.2768	75.7684	68.4333	71.8755
SG_18	0.271762	0.141251	0.296267	0.224034	0.274441	0.175429	0.245153	73.3366	64.9842	77.8401	58.534	74.4609	61.9472	68.0653
SG_30A	NA	0.114595	NA	0.238842	NA	0.160217	0.208807	70.6286	65.9091	82.5093	58.6799	75.6385	62.7444	69.0105
T141	NA	NA	0.176465	0.173396	0.201555	0.1255	0.179495	73.3366	71.7318	69.5015	56.8109	70.6386	65.3403	67.6909
T146	NA	0.131241	0.264107	0.221722	0.257903	0.165418	0.229028	79.6551	61.5792	69.111	54.876	72.9691	58.7676	65.8067
T232	NA	0.12488	0.17956	0.210281	0.203545	0.155079	0.198023	83.2657	69.1195	81.857	68.1153	81.222	69.1893	75.2519
T234	0.225785	0.107751	0.173808	0.143884	0.197896	0.11092	0.166297	79.6551	70.0745	86.698	63.9826	81.7634	67.9129	75.2485
T242	0.287228	0.119952	NA	0.211602	0.248681	0.153356	0.217337	73.3366	59.2493	71.3309	53.007	71.3361	56.4422	63.2028
T9	0.243574	NA	0.2898	0.189163	0.256242	0.137993	0.220068	56.1862	56.5841	66.6797	47.1128	61.4929	51.7764	55.6931
TR	NA	0.102219	0.145211	0.155671	0.181461	0.114864	0.158859	76.0445	73.6473	77.2919	61.9156	75.3679	68.8818	72.293
TX303	NA	0.119511	NA	0.236256	NA	0.163759	0.211817	82.3631	74.7042	NA	69.4481	81.6037	73.4495	77.9787
TZU_CHIAO_HSI_WU_105	0.202	0.120579	0.143194	0.141643	0.172006	0.120837	0.159835	69.7259	67.6099	71.5962	56.745	70.0124	62.6388	66.101
U_123	0.192199	NA	NA	0.201702	0.168502	0.146174	0.168829	57.9915	59.1159	69.9594	52.7313	63.0789	55.9992	58.8354
U267Y	0.228276	0.103354	0.117601	0.153839	0.175729	0.114287	0.156075	84.1684	71.3261	NA	74.5292	83.5627	73.7126	79.0166
VA102	NA	NA	0.166508	0.154533	0.195153	0.11363	0.165168	79.6551	65.8048	75.8621	58.8327	76.7636	63.4489	70.0689
VA14	0.215133	0.116057	0.153125	0.184174	0.183381	0.137241	0.173225	76.9472	74.7966	81.2468	64.1505	77.8165	70.3303	74.1633
VA38	NA	0.105783	0.217851	0.194309	0.228164	0.134432	0.19235	84.1684	68.4678	77.9155	64.7191	79.0866	67.3126	73.3872
VA52	0.174272	0.0980403	0.152361	0.128764	0.160608	0.096947	0.140445	70.6286	64.8918	74.3666	59.6144	71.7047	62.7632	67.1294
VA85	0.185361	0.107183	0.128901	0.130064	0.156877	0.105292	0.142885	73.3366	65.2877	81.8915	63.3524	76.7381	64.8867	70.774
VA99	0.228794	0.113972	0.15737	0.182223	0.192666	0.134029	0.175825	76.0445	67.471	80.9421	60.3587	76.9025	64.424	70.7601
VAW6	0.234295	0.109868	0.172387	0.159977	0.201977	0.121683	0.176336	77.8498	66.3256	76.2478	62.3423	75.3682	64.6445	69.8371
W_7151	0.224109	NA	0.284501	0.217514	0.243327	0.158329	0.219107	57.9915	56.116	66.6797	47.4287	61.8472	51.6837	55.8117
W117HT	NA	0.115911	0.236675	0.186149	0.240267	0.138576	0.201588	63.4074	60.7815	69.111	54.9047	64.7815	57.9085	60.8235
W153R	0.228931	0.114444	0.184607	NA	0.204147	0.134351	0.181031	72.4339	66.8288	76.2391	57.2431	73.0823	62.4062	67.6154
W182BN	0.234228	0.118991	0.192088	0.19143	0.21019	0.14349	0.191089	63.4074	66.0652	69.715	54.8663	65.8258	61.03	63.0393
W22	0.192201	0.109602	0.143277	0.169243	0.166656	0.126344	0.159707	69.7259	66.5889	74.9845	58.614	71.6238	63.2168	67.3333
W23	0.235315	0.121336	0.178336	0.165	0.205029	0.133224	0.18355	70.6286	64.9842	77.1797	56.7737	72.1185	61.1515	66.3187
W24	0.242851	0.116163	0.224753	0.225612	0.228607	0.157651	0.209182	69.7259	63.8349	76.8995	60.1958	72.4592	62.5997	67.1111
W32	0.239678	0.118055	NA	0.203557	0.208562	0.148353	0.194554	72.4339	66.8288	67.985	56.6462	69.9877	62.1411	65.6431
W37A	NA	NA	0.17098	0.184108	0.198029	0.133245	0.178337	64.31	65.9091	77.5695	56.3069	69.7057	61.6845	65.3915
W59E	NA	NA	NA	0.186206	NA	0.134531	0.181648	79.6551	67.8352	66.7541	51.3754	72.8045	60.5879	66.2812
W601S	0.205942	0.0946652	0.142606	0.174857	0.173926	0.118426	0.155486	77.8498	63.0548	74.2118	58.2981	74.278	60.9352	67.5734
W603S	NA	0.10165	NA	0.134874	NA	0.103006	0.157317	66.1153	65.2066	76.9749	59.5485	70.504	62.7624	66.6924
W604S	0.21552	0.110277	0.170695	0.201798	0.190951	0.14027	0.179178	72.4339	65.6934	71.222	56.9824	70.9667	62.1774	66.2381
W605S	0.217212	0.0794303	0.176731	NA	0.194409	0.0919881	0.158524	74.2392	64.9842	78.4578	59.2613	74.9202	62.585	68.1433
W606S	0.208707	0.118216	0.151714	0.158672	0.17926	0.127039	0.163615	74.2392	68.9806	80.5652	60.6141	76.3312	65.7126	71.2165
W607S	NA	0.0972229	0.138965	0.151341	0.177445	0.107465	0.154867	72.4339	65.6466	76.8027	58.614	73.802	62.7196	68.1394
W608S	NA	0.110556	NA	0.135293	NA	0.110839	0.163516	82.3631	67.203	81.7404	66.2383	80.5798	67.2344	73.8877
W610S	0.205526	0.0901251	0.158691	0.145609	0.180433	0.098566	0.152599	70.6286	65.0565	73.0771	63.3524	70.5846	64.9657	67.5333
W611S	0.253346	0.0992476	0.205576	0.176738	0.226344	0.12098	0.186255	73.3366	NA	77.3765	59.1104	74.1549	63.0315	68.2901
W612S	0.24619	0.102818	0.173805	0.17625	0.209108	0.122879	0.179941	76.9472	62.6274	72.3234	58.5152	73.4187	60.9116	66.714
W64A	0.236216	NA	0.181939	0.179812	0.207033	0.131488	0.182	66.1153	NA	69.3147	55.3741	67.5276	59.7095	63.0925
W703	0.209743	0.105587	0.188447	0.153285	0.195211	0.114301	0.166585	67.9206	61.7488	68.1111	51.2863	67.5657	56.7848	61.5882
W803G	0.199118	0.0976687	0.125842	0.128319	0.163156	0.0973615	0.139337	74.2392	66.3965	81.6026	62.8484	76.6114	64.7754	70.4319
W809G	0.241824	0.105997	0.181719	0.146623	0.210023	0.113259	0.176063	74.2392	70.3629	78.7208	65.8028	75.799	69.0984	72.3952
W810G	NA	0.101065	0.169206	0.166366	0.196888	0.117375	0.166857	75.1419	65.2066	77.2913	59.6679	74.9821	62.6974	68.7078
W812G	0.224134	NA	0.14939	0.138896	0.186764	0.102414	0.155655	76.0445	66.6819	82.1874	62.5003	77.8701	65.112	71.3784
W813G	0.215771	NA	0.184227	0.202686	0.196756	0.146699	0.181652	73.3366	71.3488	74.7476	61.347	72.8952	67.0873	69.7723
W814G	0.204294	0.0839323	0.153407	0.192771	0.177543	0.116178	0.156479	73.3366	68.9463	79.7964	58.5823	76.0593	64.6947	70.1867
W815G	0.209874	0.0944621	0.168722	0.145697	0.187023	0.102793	0.15675	82.3631	71.3839	80.602	69.1122	80.2999	71.0559	75.9154
W816G	0.198112	0.108204	0.152579	0.145364	0.173799	0.113366	0.15425	75.1419	68.6658	80.662	61.6362	77.0564	66.273	71.6316
W817G	0.233438	0.103484	0.165655	0.132389	0.198687	0.103338	0.163643	74.2392	66.2776	75.1561	60.4733	73.1979	63.7431	68.2569
W818G	NA	NA	0.166205	0.150565	0.194959	0.111945	0.163231	84.1684	71.212	NA	62.0361	83.0579	67.6557	74.811
W819G	NA	0.0991997	0.166144	0.167705	0.194919	0.116138	0.166391	77.8498	68.1928	83.8756	61.9139	79.5039	65.674	72.5752
W820G	NA	0.0903195	0.168365	NA	0.196347	0.102607	0.159021	82.3631	68.5649	85.4404	69.5503	81.7963	69.3941	75.9273
W821G	0.251302	0.109188	0.174656	0.156103	0.212273	0.12034	0.178791	77.8498	69.0932	80.8633	64.8778	77.9788	67.1673	72.6347
W9	NA	0.110785	0.187788	0.19377	0.208835	0.13815	0.187538	79.6551	62.4294	72.6735	56.4673	74.7565	59.6936	67.0631
WD	0.23123	NA	NA	0.199022	0.201434	0.14539	0.185727	57.9915	58.191	66.6279	51.2574	62.5033	54.4277	57.6514
WR3	NA	0.127937	NA	0.23034	NA	0.168711	0.209983	64.31	65.8427	74.5178	55.9416	68.8217	61.4052	64.9495
WU_TAN_TZAO	NA	0.0954707	0.140878	0.153221	0.178675	0.106594	0.152299	68.8233	66.6819	75.3072	60.8687	70.5281	64.2717	67.1477
WXB6	NA	0.102739	0.174806	NA	0.200488	0.118375	0.173467	82.3631	66.1003	76.4505	NA	78.6229	63.1368	71.4921
33_16	0.220557	0.0956501	NA	0.163378	0.192429	0.111949	0.164389	77.8498	68.7126	81.3319	63.1622	77.7422	66.5161	72.0638
38_11	NA	0.130042	0.181602	0.175039	0.204858	0.143315	0.191331	82.3631	66.9582	86.9233	65.2214	83.2278	66.6885	74.8962
38_11_GOODMAN_BUCKLER	NA	NA	NA	0.147914	NA	0.109312	0.161655	82.3631	74.7042	85.8803	67.7639	82.9818	72.4099	78.1858
4226	NA	NA	0.23361	0.225417	0.238296	0.163929	0.219412	73.3366	65.0565	74.279	59.5772	73.0416	63.18	67.7229
4578_INBRED	0.191079	0.113907	0.137925	0.169479	0.163798	0.1273	0.158394	70.6286	64.5984	74.2155	59.6144	71.452	62.7906	66.8726
4676A	0.2447	0.111797	0.147851	0.16801	0.197421	0.126332	0.173271	67.018	60.9198	72.6881	57.609	69.8416	59.4907	64.3913
4722	NA	NA	0.170129	0.212294	0.197482	0.154811	0.191503	84.1684	71.0884	81.0538	69.8183	80.7677	71.4444	76.3169
4F_35_BK	0.195586	0.116227	0.115116	0.113748	0.156724	0.105107	0.14159	82.3631	67.6099	83.999	61.2224	82.2875	64.8126	73.7709
52220	NA	0.0869378	0.135021	0.111517	0.174909	0.0815144	0.135636	74.2392	68.59	76.4359	62.5003	74.5626	66.0871	70.2173
740	0.217481	0.11048	0.158656	0.163477	0.186988	0.124171	0.167157	77.8498	66.0652	76.2391	63.0914	75.9646	64.9193	70.606
78371A	0.177468	0.0891882	0.128555	0.125859	0.152395	0.0902535	0.132468	75.1419	66.4938	76.3513	62.352	74.7206	64.6621	69.6843
80_2	0.291276	0.138245	0.191536	0.164318	0.241309	0.146681	0.209685	67.9206	63.8349	67.9704	54.5983	67.1256	59.4942	62.9196
YANG	NA	0.122068	NA	0.18262	NA	0.140637	0.190064	62.5047	60.7503	66.2821	52.927	63.8379	57.0455	60.0291
YE_4	0.230274	0.0998006	0.198272	0.213921	0.210607	0.13879	0.187957	74.2392	64.8869	74.0777	58.4897	73.2143	61.7053	67.1813
YE_CHI_HUNG	NA	NA	0.181879	0.240084	0.205036	0.174483	0.204216	70.6286	71.6801	70.2184	59.6679	69.5943	66.1689	67.6068
YELLOW_3_4	0.229261	0.11041	0.142363	0.186181	0.186638	0.133325	0.172	74.2392	64.4188	68.9493	57.8358	70.6684	61.7448	65.7084
YING_55	0.223469	0.0909411	NA	0.193951	0.194886	0.123194	0.17226	64.31	62.2685	69.0517	56.4673	66.0814	59.6604	62.2492
YONG_28	0.236923	NA	0.177587	0.199025	0.205599	0.145279	0.188273	73.3366	66.034	76.8396	58.3363	74.6256	62.5365	68.6421
YU796_NS	0.190409	0.0802799	0.149251	0.151567	0.168173	0.0955962	0.140118	75.1419	67.3523	77.2399	59.6968	75.0373	63.93	69.3524
