# Supplementary material
Source: publisher figshare collection journal article supplement (https://gsajournals.figshare.com/articles/dataset/_/10262951)
Supplement: Supplementary file 1 [file 1]

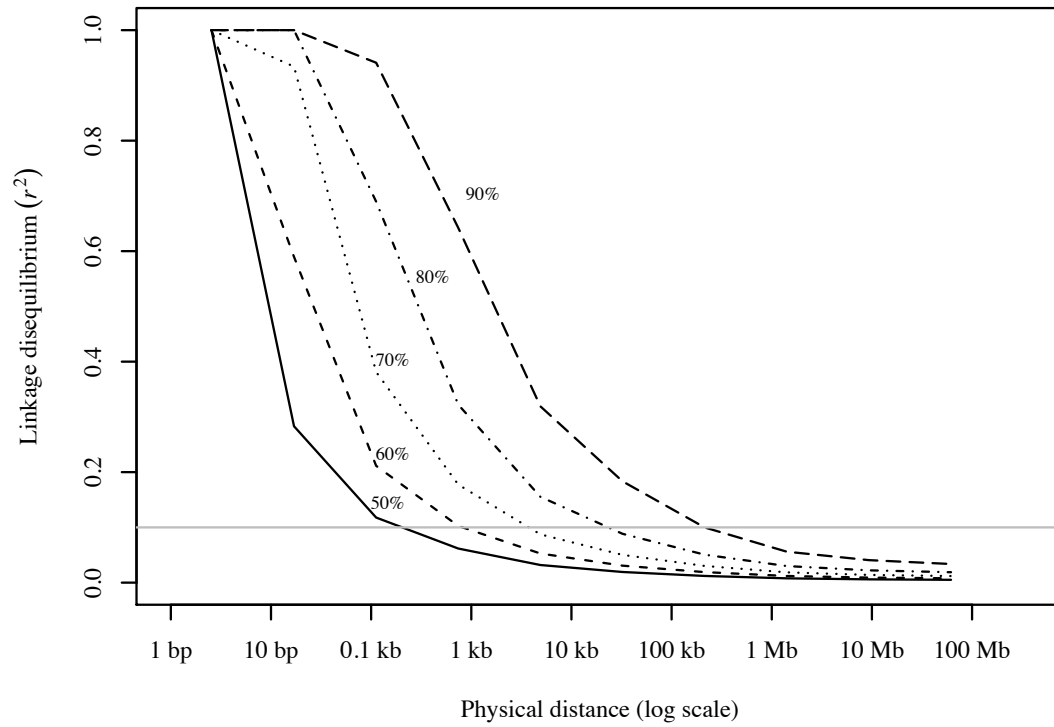

**Figure S7.** Linkage disequilibrium (LD) estimates in the Wisconsin Diversity panel. Mean decay of LD measured as pairwise  $r^2$  from the 235,004 SNP markers over physical distance. Black lines indicate the distribution of SNP markers at different percentile cutoffs. The grey horizontal line indicates  $r^2$  of 0.1.
