# Supplementary material
Source: publisher figshare collection journal article supplement (https://gsajournals.figshare.com/articles/dataset/_/10262951)
Supplement: Supplementary file 3 [file 1]

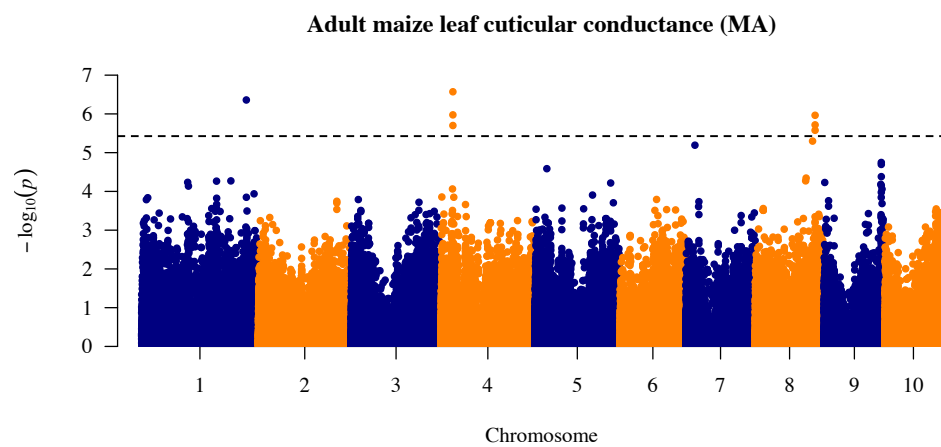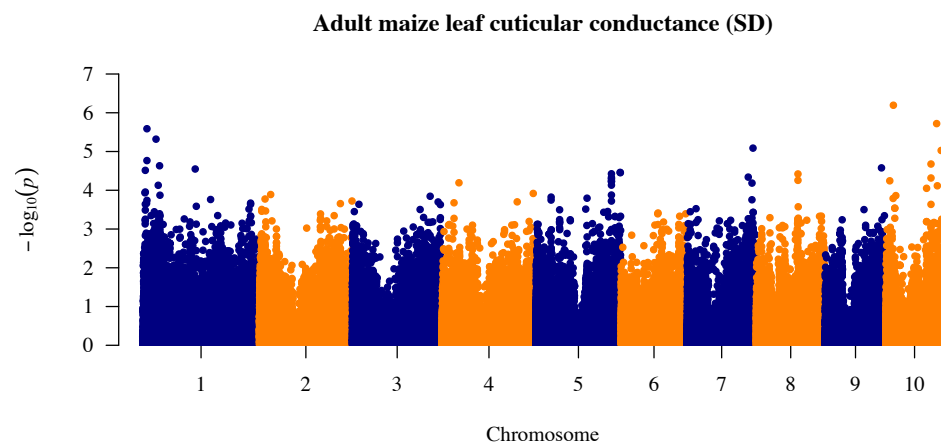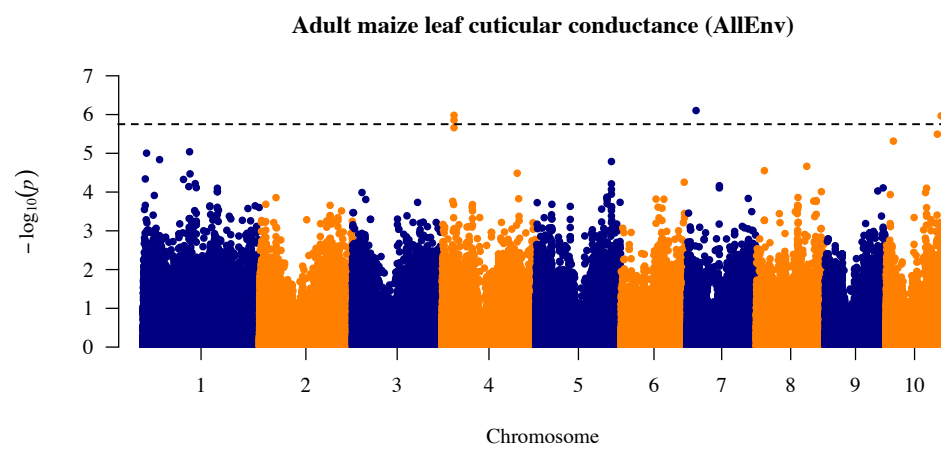

**Figure S6.** Genome-wide association study (GWAS) of adult maize leaf cuticular conductance ( $g_c$ ) conducted in locations (Maricopa, MA; and San Diego, SD) and across all four environments (AllEnv). The  $-\log_{10} P$ -value of each SNP tested in a mixed linear model analysis of  $g_c$  is plotted as a point against its physical position (B73 RefGen\_v4) for the 10 chromosomes of maize. The least significant single-nucleotide polymorphism (SNP) at a genome-wide false discovery rate of 10% is indicated by a dashed horizontal black line.
