# Supplementary material
Source: publisher figshare collection journal article supplement (https://gsajournals.figshare.com/articles/dataset/_/10262951)
Supplement: Supplementary file 4 [file 1]

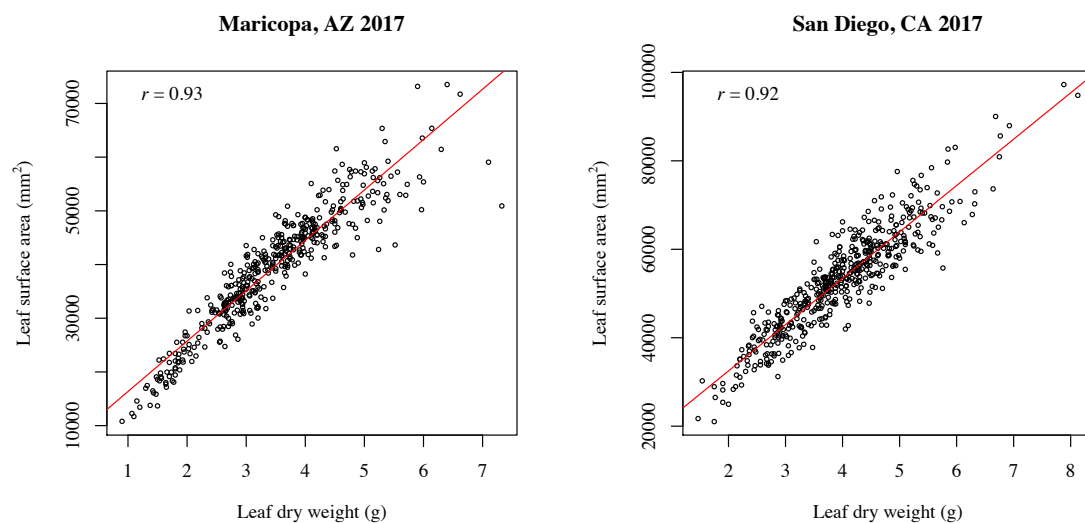

**Figure S2.** The degree of relationship (Pearson's correlation,  $r$ ) between the plot-level averages of leaf surface area (mm<sup>2</sup>) and leaf dry weight (g) collected from the same adult maize leaves used for phenotyping cuticular conductance ( $g_c$ ) in Maricopa and San Diego in 2017.
