# Supplementary material
Source: publisher figshare collection journal article supplement (https://gsajournals.figshare.com/articles/dataset/_/10262951)
Supplement: Supplementary file 10 [file 1]

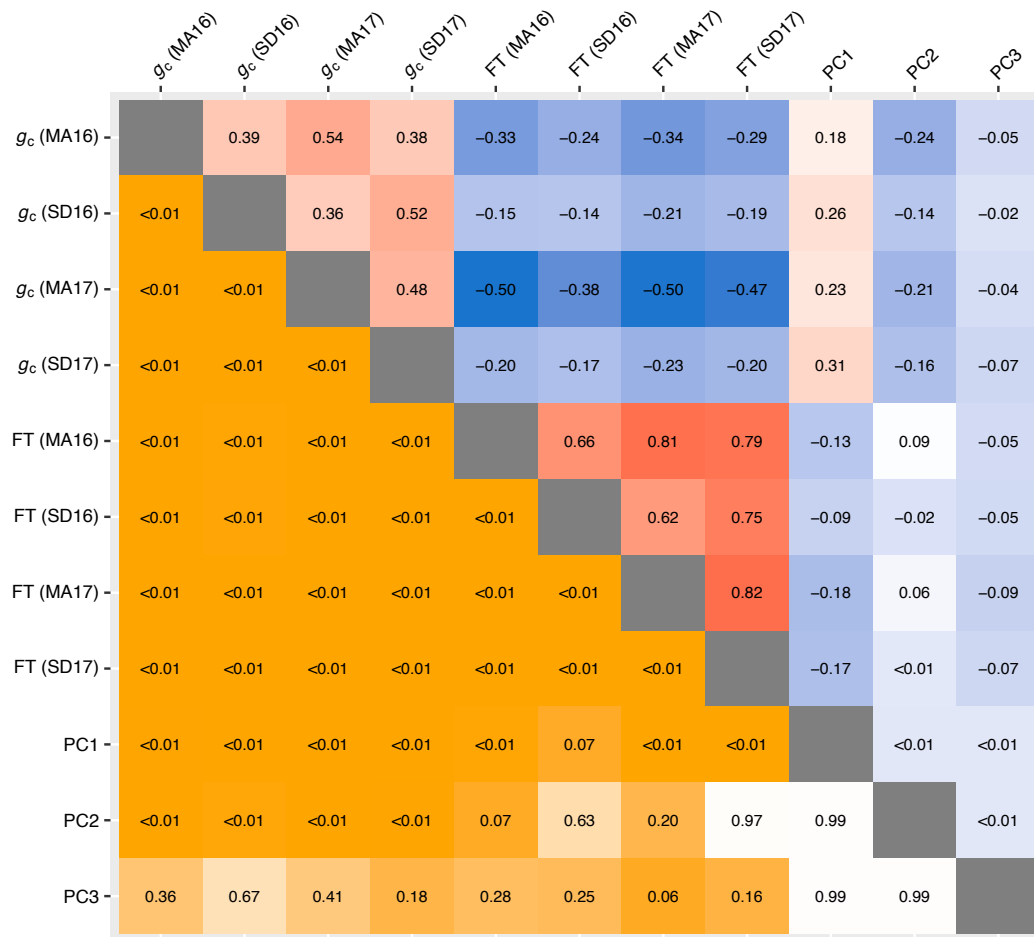

**Figure S5.** Correlation matrix for best linear unbiased predictors (BLUPs) of maize adult leaf cuticular conductance ( $g_c$ ;  $\text{g}\cdot\text{h}^{-1}\cdot\text{g}^{-1}$ ) and flowering time (FT; days to anthesis) from each of four single environments [Maricopa (MA) and San Diego (SD) in 2016 and 2017; MA16, SD16, MA17, SD17], and the first three principal components calculated from the SNP genotype matrix. Pearson's correlation coefficients ( $r$ ) are presented in the upper right triangle, while the corresponding  $P$ -values for the significance of associations ( $\alpha = 0.05$ ) are displayed below the diagonal.
