# Supplementary material
Source: publisher figshare collection journal article supplement (https://gsajournals.figshare.com/articles/dataset/_/10262951)
Supplement: Supplementary file 11 [file 1]

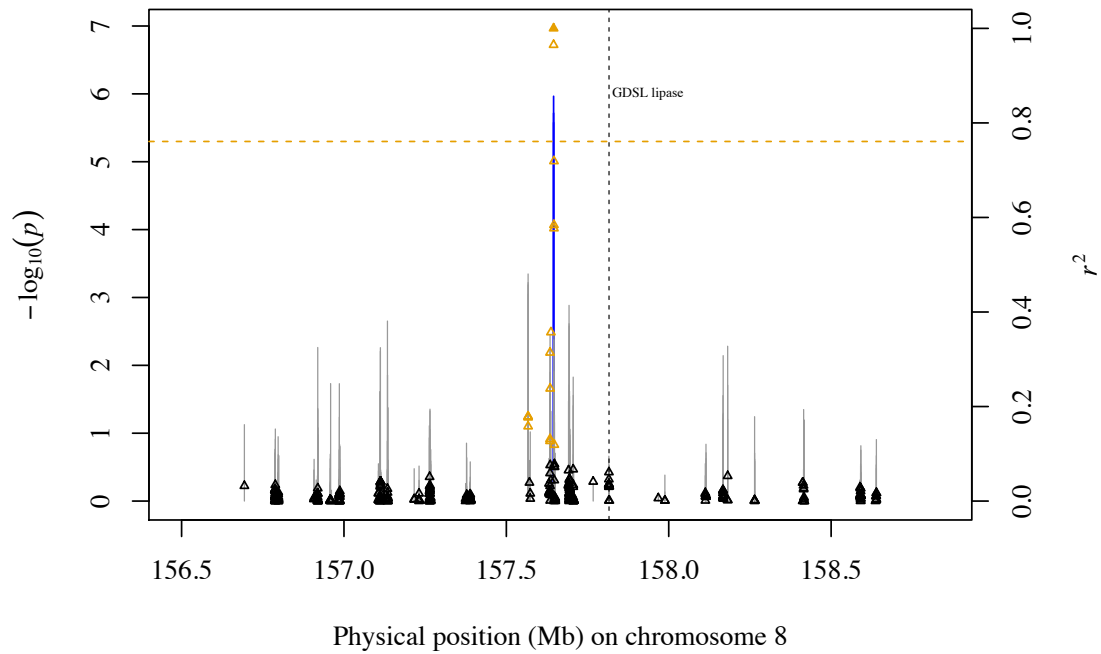

**Figure S9.** Association of SNP markers with adult maize leaf cuticular conductance ( $g_s$ ) across a genomic region on chromosome 8. Scatter plot of association results from a mixed linear model analysis of  $g_s$  conducted in Maricopa (MA) and linkage disequilibrium (LD) estimates ( $r^2$ ) for a genomic region that contains a gene encoding a protein of the GLY-ASP-SER-LEU ESTERASE/LIPASE (GDSL lipase, *Zm00001d011661*) on chromosome 8. The  $-\log_{10} P$ -values of tested single-nucleotide polymorphisms (SNPs) are represented by vertical lines. Blue vertical lines are SNPs that are statistically significant at a false discovery rate (FDR) of 10%. The  $r^2$  values of each SNP relative to the peak SNP (indicated by a solid orange triangle) at 157,645,473 bp (B73 RefGen\_v4) are indicated by triangles. Open orange triangles represent SNPs with  $r^2 > 0.1$  relative to the peak SNP. The least significant SNP at a genome-wide FDR of 10% is indicated by a dashed horizontal orange line. The black dashed vertical line indicates the genomic position of GDSL lipase.
