# Supplementary material
Source: publisher figshare collection journal article supplement (https://gsajournals.figshare.com/articles/dataset/_/10262951)
Supplement: Supplementary file 12 [file 1]

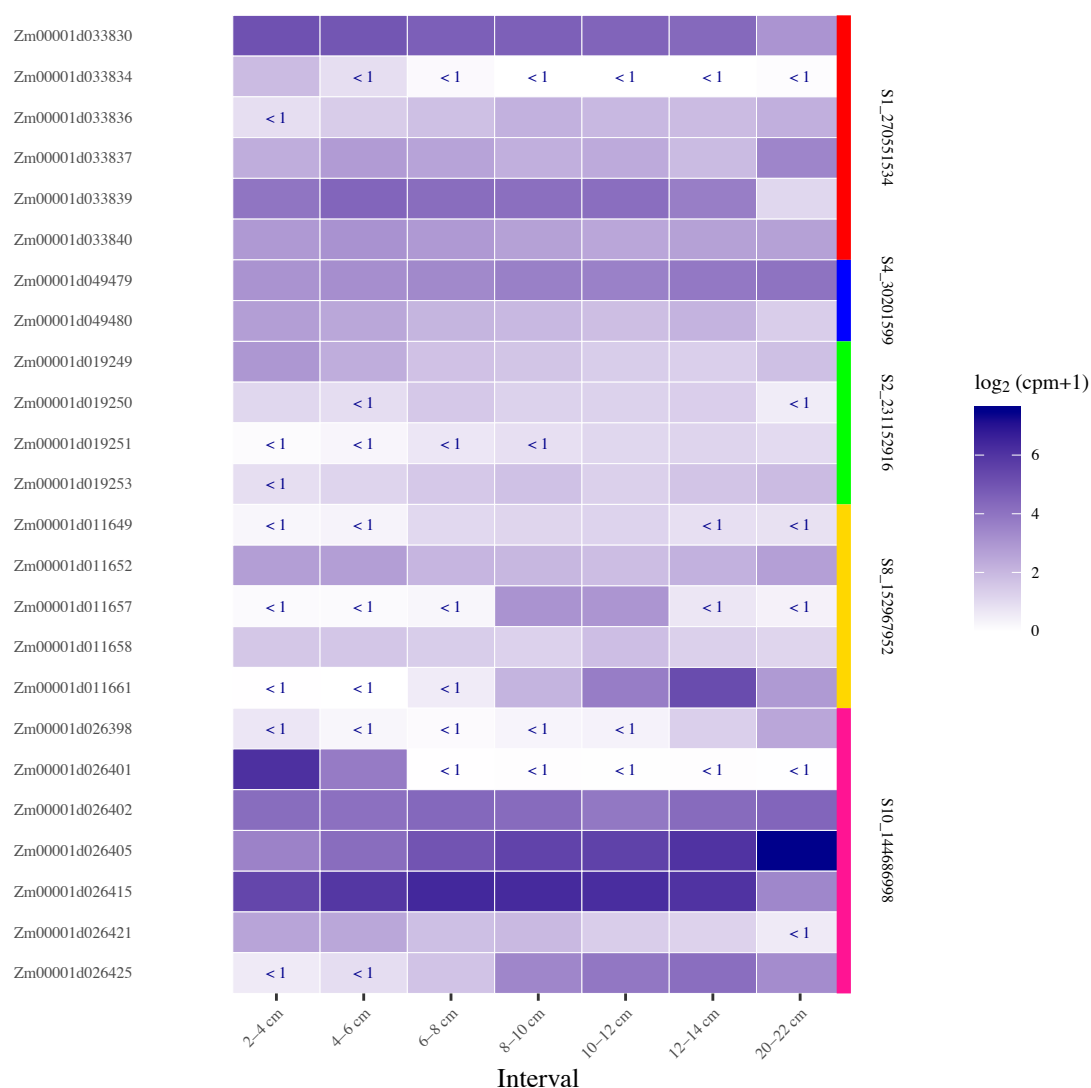

**Figure S12.** Heatmap of average  $\log_2$  transformed transcript abundance (counts per million; cpm) for the 24 candidate genes declared to be expressed in epidermal cells of expanding adult leaf 8 of maize inbred B73. A logarithmic scale was used due to the large range of cpm values across genes, and a constant with a value of 1 was added to all cpm values ( $\text{cpm} + 1$ ) to prevent the generation of negative values after  $\log_2$  transformation. Candidate genes are grouped by the five genomic regions associated with  $g_c$ , which is indicated by the peak SNP of each genomic region.
